# Supplementary material for: Nitrogen Application Alleviates the Adverse Effects of Defoliation Stress on Lolium perenne L. by Enhancing the Antioxidant System and Promoting Photosynthesis
Source: MDPI journal article supplement (doi:10.3390/agronomy12112902), 2022-11-20
Supplement: s1 [file s1]

**Nitrogen application alleviates the adverse effects of defoliation stress  
on *Lolium perenne* L. by enhancing the antioxidant system and  
promoting photosynthesis**

Hui Zuo, Shuxia Yin, Tiemei Wang, Xinyue Xiong, Mengtong Shi, Qianqian Guo\*

School of Grassland Science, Beijing Forestry University, 100083, Beijing, China

Corresponding author email: [guoqianqian@bjfu.edu.cn](mailto:guoqianqian@bjfu.edu.cn)

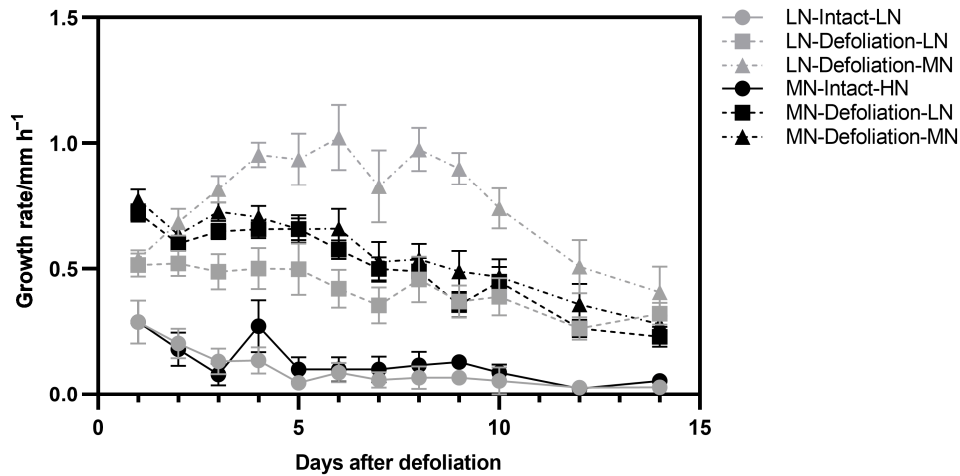

**Figure S1.** Single-day regrowth rate of perennial ryegrass after defoliation under low (0.05 mM) or moderate (5 mM) nitrate supply. Values are means  $\pm$  SE (n=10 plants)

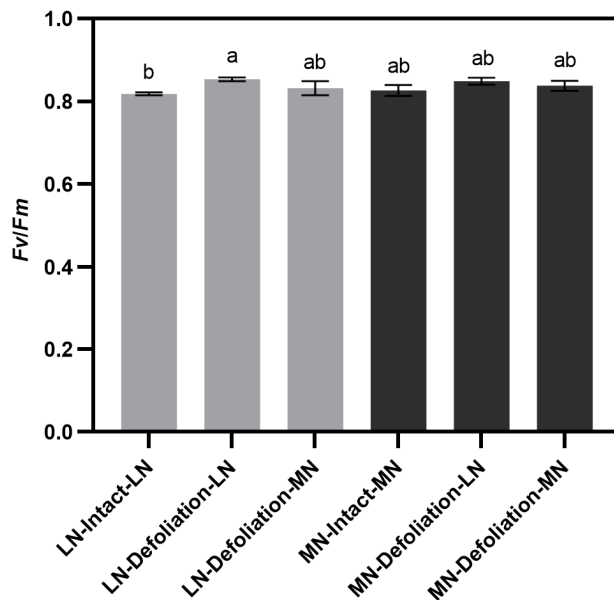

**Figure S2.** Maximum efficiency of photosystem II ( $F_v/F_m$ ) on 15th days of perennial ryegrass regrowth under low (0.05 mM) or moderate (5 mM) nitrate supply after defoliation. Values are means  $\pm$  SE (n=6 plants). Different letters indicate significant differences ( $p < 0.05$ ); the same letter indicates no significant differences between the treatments

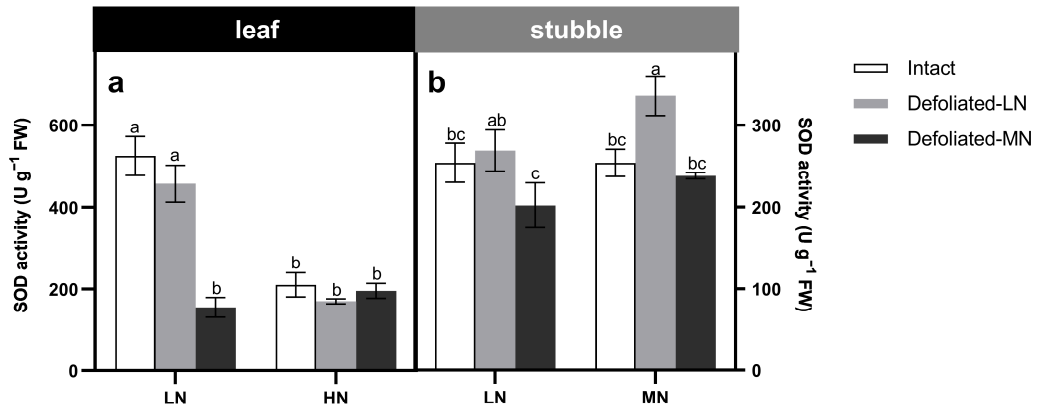

**Figure S3.** SOD activity of perennial ryegrass after defoliation under low (0.05 mM) or moderate (5 mM) nitrate supply. **(a)** SOD activity in leaf on the fifth days after defoliation, **(b)** SOD activity in stubble on the tenth days after defoliation. Values are means  $\pm$  SE (n=3 pools of six plants each). Different letters indicate significant differences ( $p < 0.05$ ); the same letter indicates no significant differences between the treatments
