# Supplementary material for: Nitrogen Application Alleviates the Adverse Effects of Defoliation Stress on Lolium perenne L. by Enhancing the Antioxidant System and Promoting Photosynthesis
Source: MDPI journal article supplement (doi:10.3390/agronomy12112902), 2022-11-20
Supplement: s1 [file s1]

Archive with 1 entries (1 files):
- agronomy-2001778-supplementary.pdf
